# Supplementary material
Source: PubMed Central journal article supplement (PMC8536868)
Supplement: immc_supplementary_data_01062021_bbab039.pdf [file immc_supplementary_data_01062021_bbab039.pdf]

# Supplementary Materials

## Supplementary Tables

**Table S1. A list of public scRNA-Seq datasets used as reference datasets by ImmClassifier.**

| <b>Dataset</b>           | <b>Platform</b>        | <b>Number of immune cells/samples</b> | <b>Number of immune cell types</b> | <b>Tissue,Cancer type/Normal</b>       | <b>Ref</b>                                        |
|--------------------------|------------------------|---------------------------------------|------------------------------------|----------------------------------------|---------------------------------------------------|
| hca-bm                   | 10X, 3' sequencing     | 101,935                               | 32                                 | Bone marrow, Normal                    | (Hay, Ferchen, Chetal, Grimes, & Salomonis, 2018) |
| pmmc                     | 10X, 3' sequencing     | 69,745                                | 31                                 | PBMC, GI cancer                        | (Griffiths et al.)                                |
| liver-immune             | 10X, 3' sequencing     | 4,906                                 | 6                                  | Liver, Normal                          | (MacParland et al., 2018)                         |
| jci-bm                   | 10X, 3' sequencing     | 73,246                                | 18                                 | Bone marrow, Normal                    | (Oetjen et al., 2018)                             |
| nsclc-zilionis-tii-minor | inDrop, full-length    | 34,558                                | 34                                 | Tumor infiltrating immune cells, NSCLC | (Zilionis et al., 2019)                           |
| brcatil                  | 10X, 3' sequencing     | 6,311                                 | 9                                  | Tumor infiltrating immune cells, TNBC  | (Savas et al., 2018)                              |
| nsclc-guo                | Smart-seq2 Full-length | 12,346                                | 16                                 | Tumor infiltrating immune cells, NSCLC | (Guo et al., 2018)                                |

**Table S2. Full name of cell types in cell type hierarchy.**

| <b>Full Name</b> | <b>Short Name</b>                          |
|------------------|--------------------------------------------|
| CD34             | CD34-positive stem cell                    |
| L                | lymphocyte                                 |
| M                | myeloid cell                               |
| HSC              | hematopoietic stem cell                    |
| pDC              | plasmacytoid dendritic cell                |
| mDC              | monocyte-derived dendritic cell            |
| cDC              | conventional dendritic cell                |
| Mast             | mast cell                                  |
| Mega             | megakaryocyte                              |
| Ery              | erythrocyte                                |
| Neu              | neutrophil                                 |
| Mono             | monocyte                                   |
| Mac              | macrophage                                 |
| Eos              | eosinophil                                 |
| T                | T cell                                     |
| NK               | natural killer cell                        |
| B                | B cell                                     |
| unconvT          | unconventional T cell                      |
| CD4+             | CD4-positive T cell                        |
| CD8+             | CD8-positive T cell                        |
| CD4+Tn           | CD4-positive naïve T cell                  |
| CD4+Tcm          | CD4-positive central memory T cell         |
| CD4+Tem          | CD4-positive effector memory T cell        |
| CD4+Trm          | CD4-positive tissue-resident memory T cell |
| CD4+Tex          | CD4-positive exhausted T cell              |

|         |                                            |
|---------|--------------------------------------------|
| Treg    | regulatory T cell                          |
| Tfh     | helper T cell                              |
| CD8+Tn  | CD8-positive naïve T cell                  |
| CD8+Tcm | CD8-positive central memory T cell         |
| CD8+Tem | CD8-positive effector memory T cell        |
| CD8+Tex | CD8-positive exhausted T cell              |
| CD8+Trm | CD8-positive tissue-resident memory T cell |
| MAIT    | mucosal invariant T cell                   |
| gdT     | Gamma-delta T cell                         |
| PC      | plasma cell                                |

**Table S3. The number of cells sampled to train deep neural network.**

| Cell number (N)      | Sampled cell number per cell type |
|----------------------|-----------------------------------|
| $N < 1000$           | 1000                              |
| $1000 \leq N < 2000$ | 1200                              |
| $2000 \leq N < 5000$ | 1400                              |
| $N \geq 5000$        | 1600                              |

**Table S4. Mapping IDs of cell types between different annotation methods.**

| Dataset | Cell type  | Original             | ImmClassifier | SingleR      | Garnett         | SCINA                | SciBet              |
|---------|------------|----------------------|---------------|--------------|-----------------|----------------------|---------------------|
| Brca3p  | Treg       | T:reg                | L:T:CD4:Treg  | Treg*        |                 | Treg.cells           |                     |
|         | CD4+T      | T:CD4.*              | L:T:CD4*      | T_cells:CD4* | CD4 T cells     |                      |                     |
|         | CD8+T      | T:CD8*               | L:T:CD8*      | T_cells:CD8* | CD8 T cells     | CD8.T.cells          |                     |
|         | B          | B                    | L:B           | B_cell*      | B cells         | B.cells              | B cell,<br>Plasma B |
|         | NK         | NK*(NKT<br>excluded) | L:NK          | NK*          | NK cells        | CD56dim.N<br>K.cells | NK                  |
|         | mDC        | mDC                  | M:cDC         | DC:m*        | Dendritic cells | Dendritic.ce<br>lls  | DC                  |
|         | pDC        | pDC                  | L:pDC,M:pDC   |              |                 |                      |                     |
|         | MONOCYTE   | MONOCYTE             | M:Mono        | Monocyte*    | Monocytes       |                      | Monocyte            |
|         | MACROPHAGE | MACROPHAGE           | M:Mac         | Macrophage*  |                 | Macrophages          | Macrophage          |
|         | Neutrophil | NEUTROPHIL           | M:Neu         | Neutrophil*  |                 | Neutrophils          |                     |
|         | Mast       | MAST                 | M:Mast        |              |                 | Mast.cells           | Mast                |
|         | Unassigned |                      |               |              | Unknown         | unknown              |                     |
|         | T          |                      |               |              | T cells         |                      | T cell,<br>ILC      |
|         | NKT        | NKT                  |               |              |                 |                      |                     |

|         |                        |             |                                                                  |                                                                                                                                                                                              |                                                                                                                      |             |                                                                                           |
|---------|------------------------|-------------|------------------------------------------------------------------|----------------------------------------------------------------------------------------------------------------------------------------------------------------------------------------------|----------------------------------------------------------------------------------------------------------------------|-------------|-------------------------------------------------------------------------------------------|
|         | Other                  |             | CD34*, L:unconvT,<br>M:Eos, M:Ery,<br>M:Mega,M:Platelet,L:<br>PC | Chondrocytes*, CMP,<br>Embryonic_stem_cells,<br>Endothelial_cells*,<br>Erythroblast, Fibroblast*,<br>GMP, HSC*,<br>iPS_cells*,pre-B*, pro-B*,<br>Smooth_muscle_cells*,<br>Tissue_stem_cells* |                                                                                                                      |             | Epithelial,<br>Microglia,<br>Endothelial                                                  |
| Brcap5p | T:CD4+Naive            | T:CD4+Naive | L:T:CD4:Naive                                                    | T_cell:CD4+_Naive                                                                                                                                                                            |                                                                                                                      |             |                                                                                           |
|         | T:CD4+CM               | T:CD4+CM    | L:T:CD4:CM                                                       | T_cell:CD4+_central_memory                                                                                                                                                                   |                                                                                                                      |             |                                                                                           |
|         | T:CD4+EM               | T:CD4+EM    | L:T:CD4:EM                                                       | T_cell:CD4+_effector_memory                                                                                                                                                                  |                                                                                                                      |             |                                                                                           |
|         | T:CD8+Naive            | T:CD8+Naive | L:T:CD8:Naive                                                    | T_cell:CD8+_naive                                                                                                                                                                            |                                                                                                                      |             |                                                                                           |
|         | T:CD8+CM               | T:CD8+CM    | L:T:CD8:CM                                                       | T_cell:CD8+_Central_memory                                                                                                                                                                   |                                                                                                                      |             |                                                                                           |
|         | T:CD8+EM               | T:CD8+EM    | L:T:CD8:EM                                                       | T_cell:CD8+_effector_memory*                                                                                                                                                                 |                                                                                                                      |             |                                                                                           |
|         | Treg                   | Treg        | L:T:CD4:Treg                                                     | T_cell:Treg:Naive                                                                                                                                                                            |                                                                                                                      | Treg.cells  |                                                                                           |
|         | CD4+T                  |             |                                                                  | T_cell:CD4+                                                                                                                                                                                  | CD4 T cells                                                                                                          |             |                                                                                           |
|         | CD8+T                  |             |                                                                  | T_cell:CD8+                                                                                                                                                                                  | CD8 T cells                                                                                                          | CD8.T.cells |                                                                                           |
|         | T                      |             |                                                                  |                                                                                                                                                                                              | T cells                                                                                                              | T cell      |                                                                                           |
|         | Exhausted T            |             | L:T:CD4:Ex,L:T:CD8:Ex                                            | T_cell:gamma-delta                                                                                                                                                                           |                                                                                                                      |             |                                                                                           |
|         | Tissue-resident memory |             | L:T:CD4:TRM,L:T:CD8:TRM                                          |                                                                                                                                                                                              |                                                                                                                      |             |                                                                                           |
|         | Other                  |             | CD34*,L:unconvT*,M*,<br>L:B*,L:T:CD4:Tfh                         | Tissue_stem_cells*,B_cell*,<br>Endothelial_cells*,Epithelial_cells*,<br>Keratinocytes*,Macrophage*,<br>Monocyte*,NK*,T_cell:gamma-delta                                                      | Tfh.cells,<br>Tm.cells,<br>Neutrophil,<br>Th*.cells,<br>Macrophage,<br>Dendritic.cells,<br>B.cells,<br>CD56*NK.cells |             | B cell,<br>NK,<br>Macrophage,<br>Plasma B,<br>Mast,<br>HSCs,<br>Skeletal Muscle Myoblasts |

|     |                                    |                                    |                                                                                         |                         |         |             |  |
|-----|------------------------------------|------------------------------------|-----------------------------------------------------------------------------------------|-------------------------|---------|-------------|--|
| hcc | cytotoxic CD4 cells                | cytotoxic CD4 cells                |                                                                                         |                         |         |             |  |
|     | effector memory CD8+T cells        | effector memory CD8+T cells        | L:T:CD8:EM                                                                              |                         |         |             |  |
|     | exhausted CD4+ T cells             | exhausted CD4+ T cells             | L:T:CD8:Ex                                                                              |                         |         |             |  |
|     | intermediate of EM and Exhausted T | intermediate of EM and Exhausted T | L:T:CD4:EM,<br>L:T:CD8:EM,<br>L:T:CD4:TRM,<br>L:T:CD8:TRM,<br>L:T:CD4:Ex,<br>L:T:CD8:Ex | T_cell:effector_memory* |         |             |  |
|     | exhausted CD8+ T cells             | exhausted CD8+ T cells             | L:T:CD4:Ex                                                                              |                         |         |             |  |
|     | MAIT cells                         | MAIT cells                         | L:unconvT:MAIT                                                                          |                         |         |             |  |
|     | naive CD4+ T cells                 | naive CD4+ T cells                 | L:T:CD4:Naive                                                                           | T_cell:CD4+_Naive       |         |             |  |
|     | Tregs                              | Tregs*                             | Treg                                                                                    | Treg*                   |         | Treg.cells  |  |
|     | naive CD8+ T cells                 | naive CD8+ T cells                 | L:T:CD8:Naive                                                                           | T_cell:CD8+_Naive       |         |             |  |
|     | CD4+T                              |                                    |                                                                                         | T_cell:CD4+             |         |             |  |
|     | CD8+T                              |                                    |                                                                                         | T_cell:CD8+             |         | CD8.T.cells |  |
|     | T helper                           | T helper                           | L:T:CD4:Tfh                                                                             |                         |         | Th*cells    |  |
| T   |                                    |                                    |                                                                                         | T cells                 | T.cells | T cell, ILC |  |

|         |                            |                            |                       |                                                             |                                                      |                                                                                         |                                                                                                      |
|---------|----------------------------|----------------------------|-----------------------|-------------------------------------------------------------|------------------------------------------------------|-----------------------------------------------------------------------------------------|------------------------------------------------------------------------------------------------------|
|         | unknown                    | unknown                    |                       |                                                             |                                                      |                                                                                         |                                                                                                      |
|         | central memory T           |                            | L:T:CD4:CM,L:T:CD8:CM | T_cell:Central_memory*                                      |                                                      |                                                                                         |                                                                                                      |
|         | Other                      |                            | CD34, L:B*, L:NK, M*  | Endothelial_cells*, Epitheial_cells, NK*,T_cell:gamma-delta | B cells, CD34+, Dendritic cells, Monocytes, NK cells | Tm.cells, Treg.cells, Mast.cells, *NK*, Neutrophils, Dendritic.cells, Macrophages, Tfh* | NK, Macrophage, B cell, HEK and 3T3 mix, epithelial cells, Mast, HSCs, Plasma B, foreskin fibroblast |
|         | Unassigned                 |                            |                       |                                                             | Unknown                                              | unknown                                                                                 |                                                                                                      |
| pbmc68k | CD14+ Monocyte             | CD14+ Monocyte             | M:Mono                | Monocyte                                                    | Monocytes                                            |                                                                                         | Monocyte                                                                                             |
|         | CD19+ B                    | CD19+ B                    | L:B*                  | B_cell*, Plasma_cell*,pre-B*                                | B cells                                              | B.cells                                                                                 | B cell, Plasma B                                                                                     |
|         | CD34+                      | CD34+                      | CD34*                 | CMP,GMP,MEP,CD34+*                                          | CD34                                                 |                                                                                         | HSCs                                                                                                 |
|         | CD4+ T Helper2             | CD4+ T Helper2             | L:T:CD4:Tfh           |                                                             |                                                      | Th*, Tfh*                                                                               |                                                                                                      |
|         | CD4+/CD45RA+/CD24- Naive T | CD4+/CD45RA+/CD24- Naive T | L:T:CD4:Naive         | T_cell:CD4+_Naive                                           |                                                      |                                                                                         |                                                                                                      |



|                                     |                                     |                                                                                                               |                                                                 |                 |                     |                                                                                       |
|-------------------------------------|-------------------------------------|---------------------------------------------------------------------------------------------------------------|-----------------------------------------------------------------|-----------------|---------------------|---------------------------------------------------------------------------------------|
| CD4+/CD45<br>RO+<br>Memory          | CD4+/CD45R<br>O+ Memory             | L:T:CD4:CM,L:T:CD4:<br>EM                                                                                     | T_cell:CD4+_central_mem<br>ory,T_cell:CD4+_effector_<br>memory  |                 |                     |                                                                                       |
| CD56+ NK                            | CD56+ NK                            | L:T:NK                                                                                                        | NK*                                                             | NK cells        | *NK*                | NK                                                                                    |
| CD8+<br>Cytotoxic T                 | CD8+<br>Cytotoxic T                 |                                                                                                               |                                                                 |                 |                     |                                                                                       |
| CD8+/CD45<br>RA+ Naive<br>Cytotoxic | CD8+/CD45R<br>A+ Naive<br>Cytotoxic | L:T:CD8:Naïve                                                                                                 | T_cell:CD8+_Naive                                               |                 |                     |                                                                                       |
| Dendritic                           | Dendritic                           | *DC*                                                                                                          | DC*                                                             | Dendritic cells | Dendritic.ce<br>lls | DC                                                                                    |
| CD4+T                               |                                     |                                                                                                               | T_cell:CD4+                                                     | T_cell:CD4+     |                     |                                                                                       |
| CD8+T                               |                                     |                                                                                                               | T_cell:CD8+                                                     | T_cell:CD8+     | CD8.T.cells         |                                                                                       |
| CD8+<br>memory                      |                                     | L:T:CD8:CM,L:T:CD8:<br>EM                                                                                     | T_cell:CD8+_Central_me<br>mory,T_cell:CD8+_effector<br>_memory* |                 |                     |                                                                                       |
| CD4+/CD25<br>T Reg                  |                                     | L:T:CD4:Treg                                                                                                  | Treg*                                                           |                 | Treg.cells          |                                                                                       |
| T                                   |                                     |                                                                                                               |                                                                 | T cells         |                     | T cell                                                                                |
| Other                               |                                     | L:T:CD4:TRM,L:T:CD<br>8:TRM,M:Eos,M:Ery,<br>M:Mac,M:Mega*,M:Ne<br>u,L:unconvT* ,<br>L:T:CD4:Ex,<br>L:T:CD8:Ex | Platelets, pro-B* ,<br>T_cell:gamma-delta                       |                 |                     | Mast,Epit<br>helial,<br>Pancreati<br>c islets,<br>Endotheli<br>al,<br>hepatocyt<br>es |
| unassigned                          |                                     |                                                                                                               |                                                                 | Unknown         |                     |                                                                                       |

**Table S5. A list of public scRNA-Seq and bulk-sequencing datasets used for evaluation datasets by ImmClassifier.**

| <b>Dataset</b> | <b>Platform</b>        | <b>Number of immune cells/samples</b> | <b>Number of immune cell types</b> | <b>Tissue,Cancer type/Normal</b>                   | <b>Ref</b>                  |
|----------------|------------------------|---------------------------------------|------------------------------------|----------------------------------------------------|-----------------------------|
| brca3p         | inDrop,3' sequencing   | 47,016                                | 19                                 | PBMC, tumor, adjacent normal and lymph nodes, BRCA | (Azizi et al., 2018)        |
| brca5p         | 10X, 5' sequencing     | 28,013                                | 8                                  | PBMC, tumor, adjacent normal and lymph nodes, BRCA | (Azizi et al., 2018)        |
| hcc            | Smart-seq2 Full-length | 5,603                                 | 12                                 | PBMC, tumor and adjacent normal, HCC               | (C. Zheng et al., 2017)     |
| hnsc           | Smart-seq2 Full-length | 5,902                                 | 5                                  | Tumor and lymph nodes, HNSCC                       | (Puram et al., 2017)        |
| pbmc68k        | 10X, 3' sequencing     | 68,579                                | 11                                 | PBMC, Healthy                                      | (G. X. Zheng et al., 2017)  |
| skcm           | Smart-seq2 Full-length | 16,291                                | 11                                 | Tumor, SKCM                                        | (Sade-Feldman et al., 2018) |
| bulk           | Microarray             | 211                                   | 38                                 | PBMC, BM, Healthy                                  | (Novershtern et al., 2011)  |

# Supplementary Figures

Figure S1

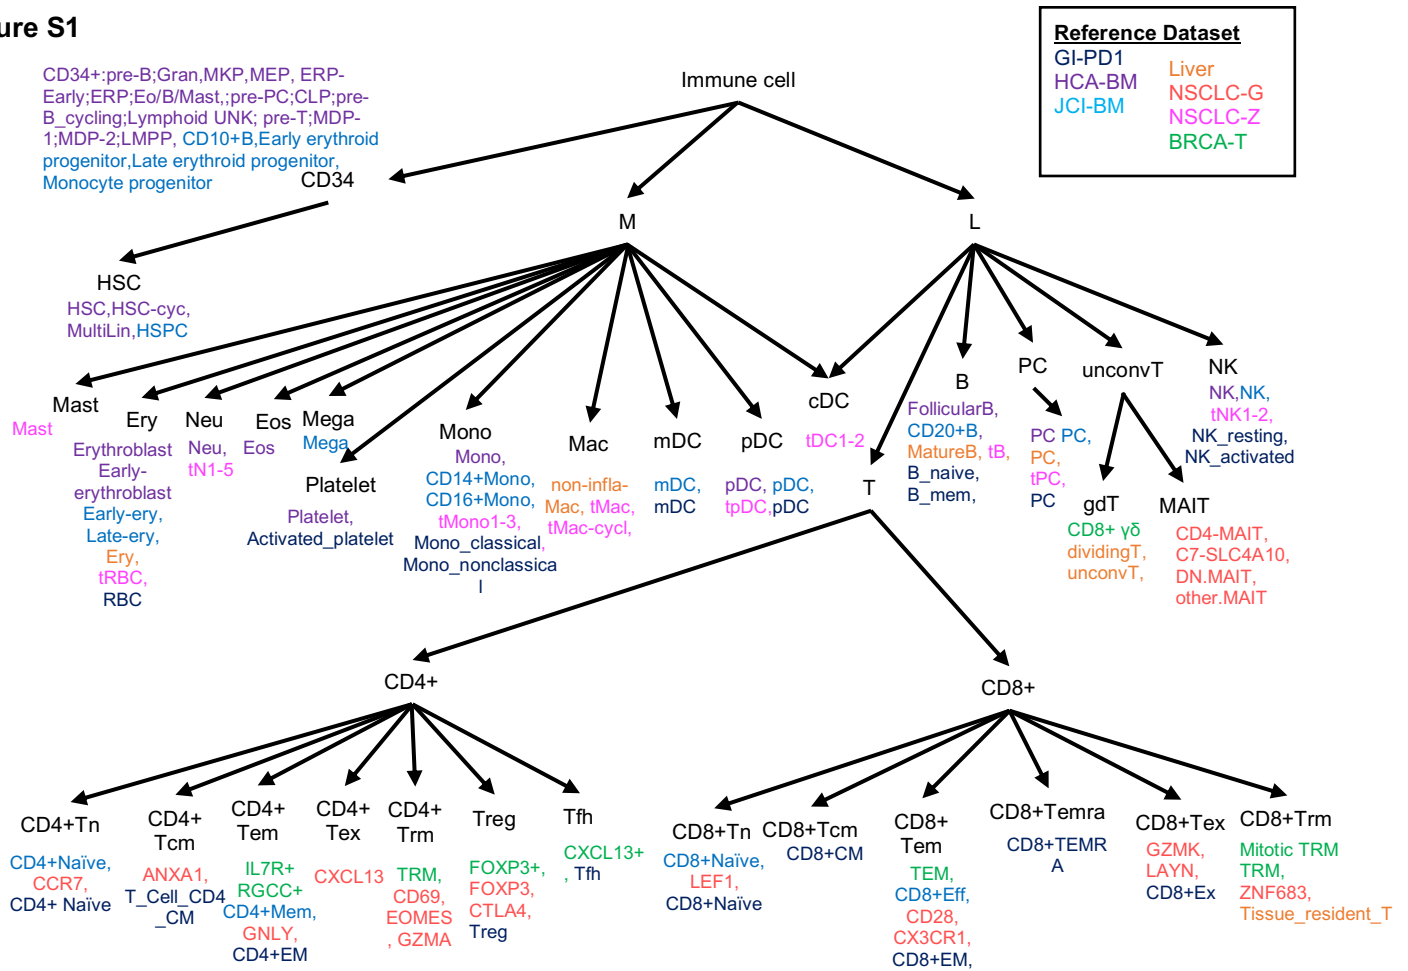

**Figure S1. Cell ontology hierarchy used by ImmClassifier.** The hierarchy is revised from cell differentiation hierarchy to accommodate for prediction probability. The hierarchy represents cell annotation granularity. Each node on the tree is a flat cell type. For each flat cell type (tree node), the matched cell types from training datasets are listed.

## Figure S2

a

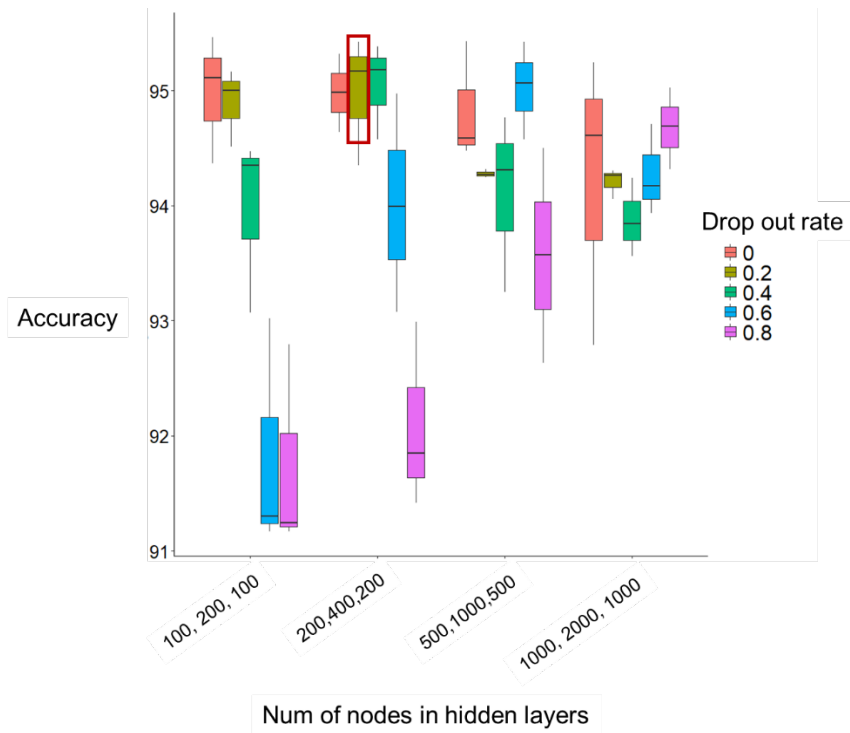

b

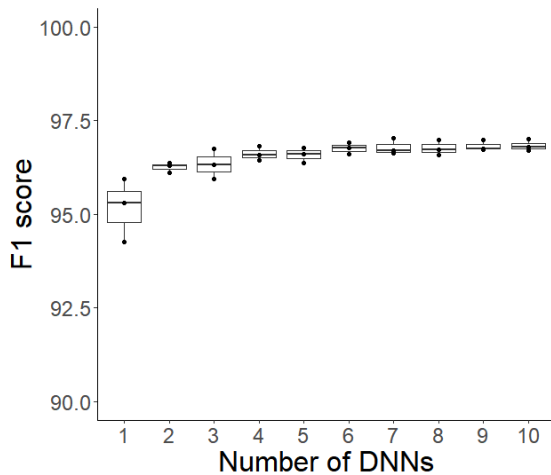

### Figure S2. Evaluation of hyper-parameters for DNN using 3-fold cross-validation.

(a) The prediction accuracy (as a percent) was shown under different combinations of the number of nodes in hidden layers and drop-out rate. The hyper-parameter with the best performance is in the red square. (b) The F1 score (as a percent) is shown as the number of DNNs ranges from 1 to 10.

# Figure S3

**a**

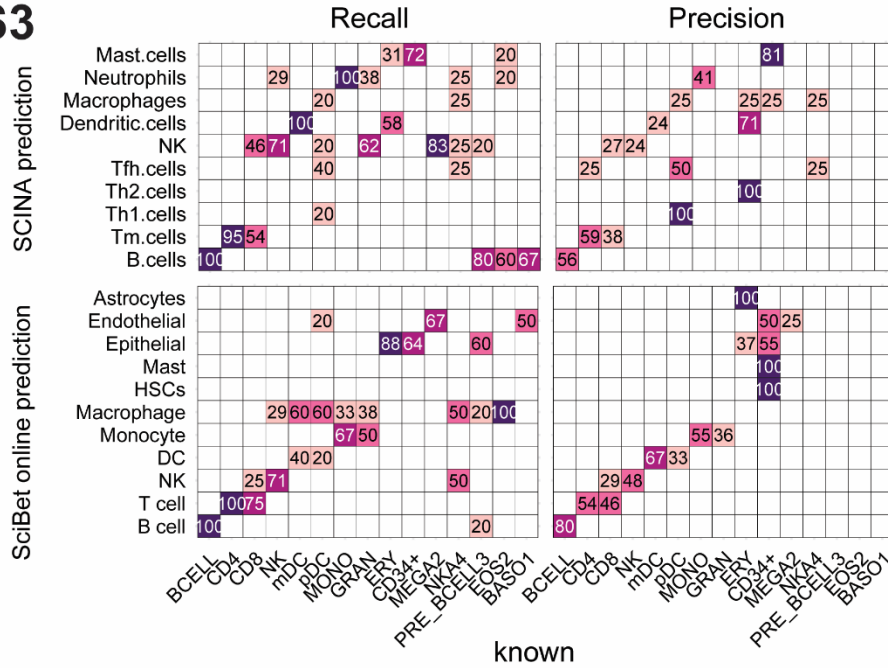

**b**

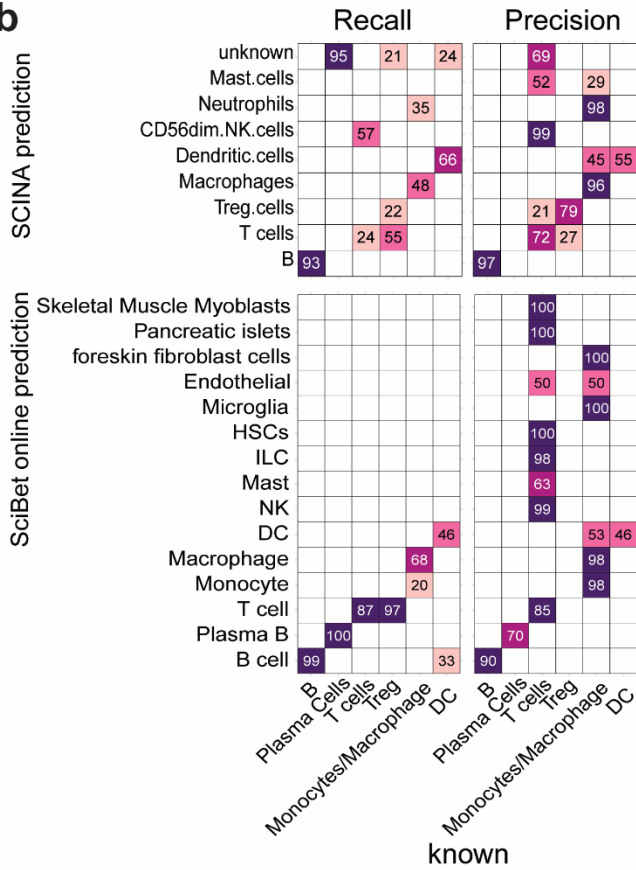

**c**

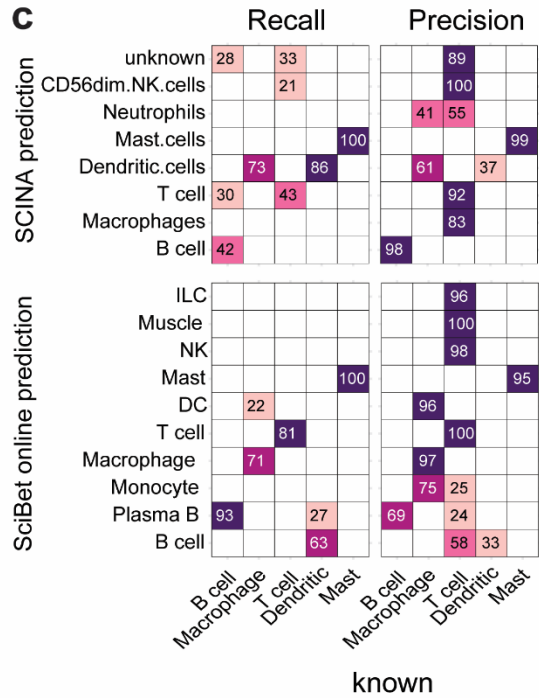

**Figure S3. The performance of SCINA and SciBet to predict immune cell types.** These heatmaps compare the cell types from the original publication (rows) to those inferred by SCINA and SciBet (columns). The color represents the recall and precision score (as a percent) of each original cell type predicted by ImmClassifier. Recall and precision scores no less than 20 are labeled. Three datasets tested are (a) purified immune populations sequenced by microarray platform. (b) SKCM. The *Other* row includes a small number of cells predicted to cell types not included the original annotated ones. (c) HNSCC. The *Other* row includes a small number of cells predicted to cell types not included the original annotated ones. Since ImmClassifier has finer annotation granularity than the original annotation, for the purpose of comparison, the annotation terms of equivalent granularity to the original annotation were used.

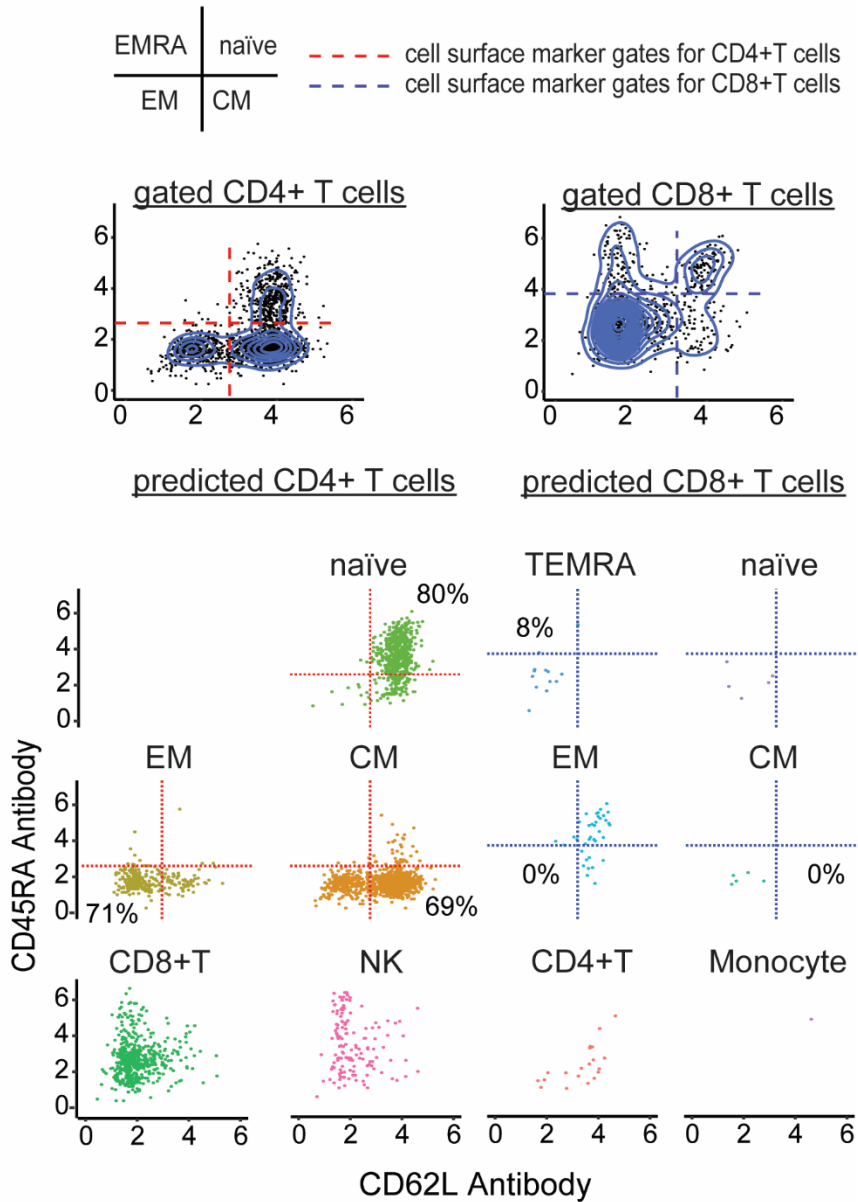

**Figure S4. Visualization of the prediction of SingleR on fine-grained T cells.** T cells were gated into EMRA, naïve, EM and CM immunophenotypes in the original publication. (Top panel) density plots of the gated CD4+T and CD8+T cells in the original publication. (Bottom panel) scatterplots of the cells in each predicted cell type by SingleR (fine subtype mode). The percentage of cells in each predicted cell type that fall into the concordant gated quadrant is labeled.
